# Supplementary material
Source: publisher figshare collection journal article supplement (https://acs.figshare.com/ndownloader/files/7826926)
Supplement: Supplementary file 1 [file 7826926]

**Supporting Information:**

**A Strategy for Low Thermal Conductivity and Enhanced  
Thermoelectric Performance in SnSe: Porous  $\text{SnSe}_{1-x}\text{S}_x$  Nanosheets**

Hyun Ju, Myeongjin Kim Dabin Park, and Jooheon Kim\*

School of Chemical Engineering & Materials Science,  
Chung-Ang University, Seoul 06974, Republic of Korea

\*Corresponding author: jooheonkim@cau.ac.kr (J. Kim)

Supporting Information Contents:

1. Figures
2. Tables
3. Extended discussion

## 1. Figures

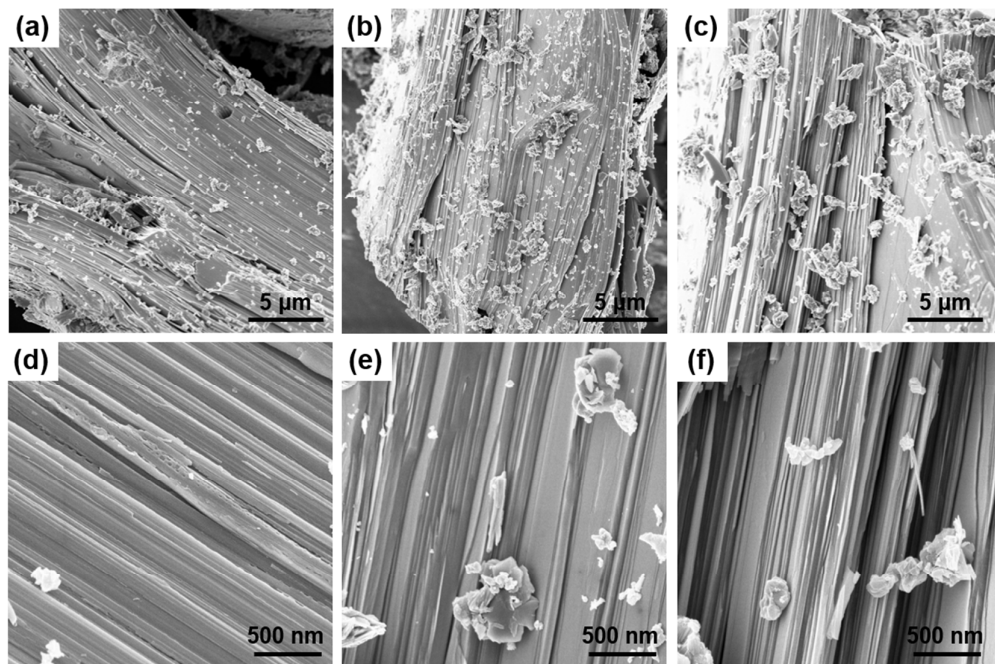

Figure S1. Low- and high-magnification FE-SEM images of the  $\text{SnSe}_{1-x}\text{S}_x$  powders. (a,d)  $\text{SnSe}_{0.6}\text{S}_{0.4}$ , (b,e)  $\text{SnSe}_{0.4}\text{S}_{0.6}$ , (c,f)  $\text{SnSe}_{0.2}\text{S}_{0.8}$ .

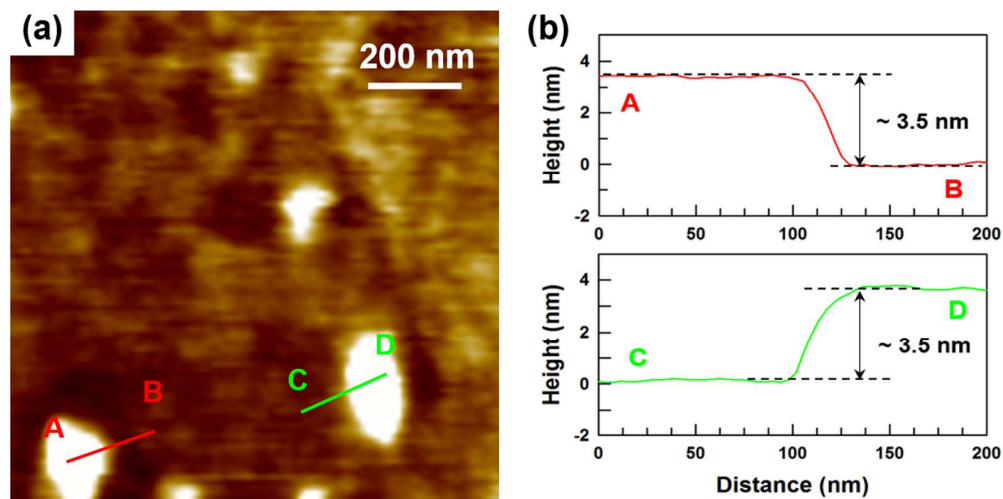

Figure S2. (a) AFM image and (b) the corresponding height profile of the exfoliated  $\text{SnSe}_{0.8}\text{S}_{0.2}$  NS.

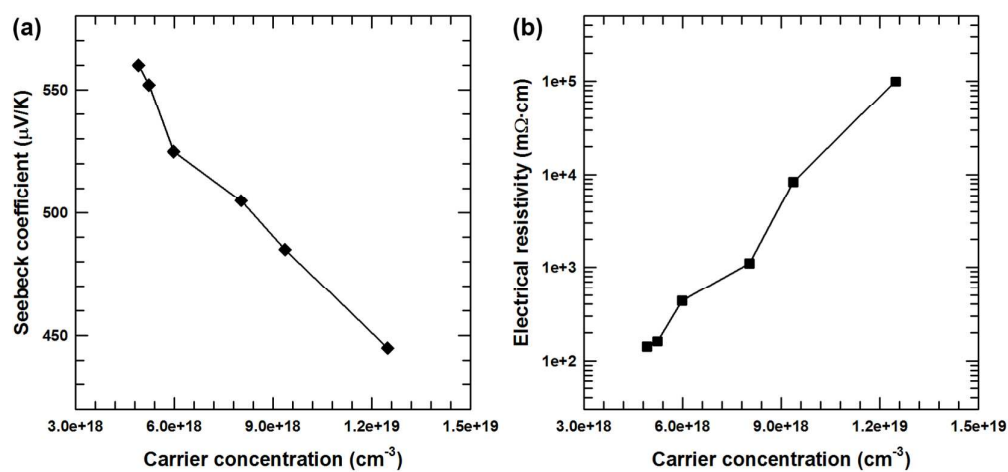

Figure S3. (a) Seebeck coefficient and electrical resistivity values of  $\text{SnSe}_{1-x}\text{S}_x$  NSs as a function of the carrier concentration.

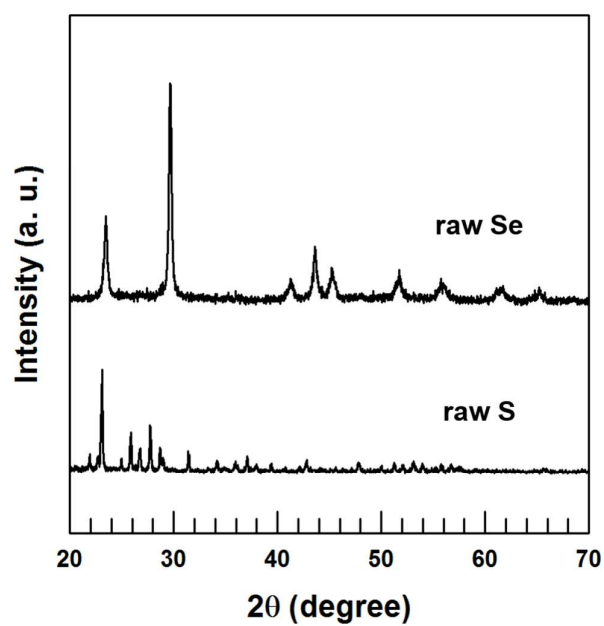

Figure S4. XRD patterns of the pristine Se and S materials.

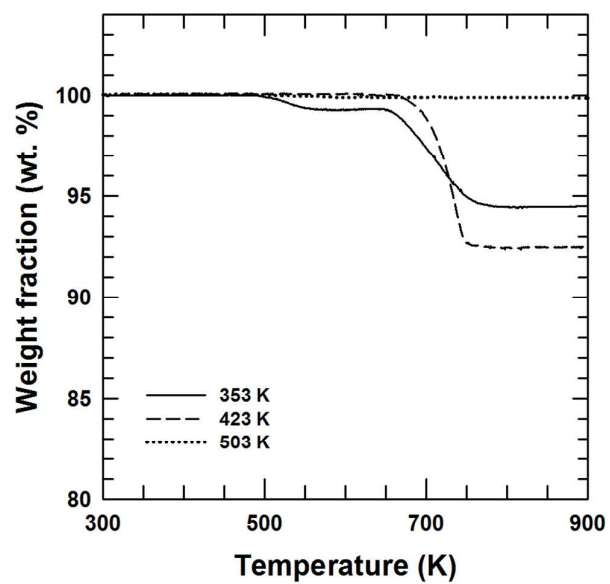

Figure S5. TGA results of the porous  $\text{SnSe}_{0.8}\text{S}_{0.2}$  NSs at the reaction temperature of 353, 423, and 503 K.

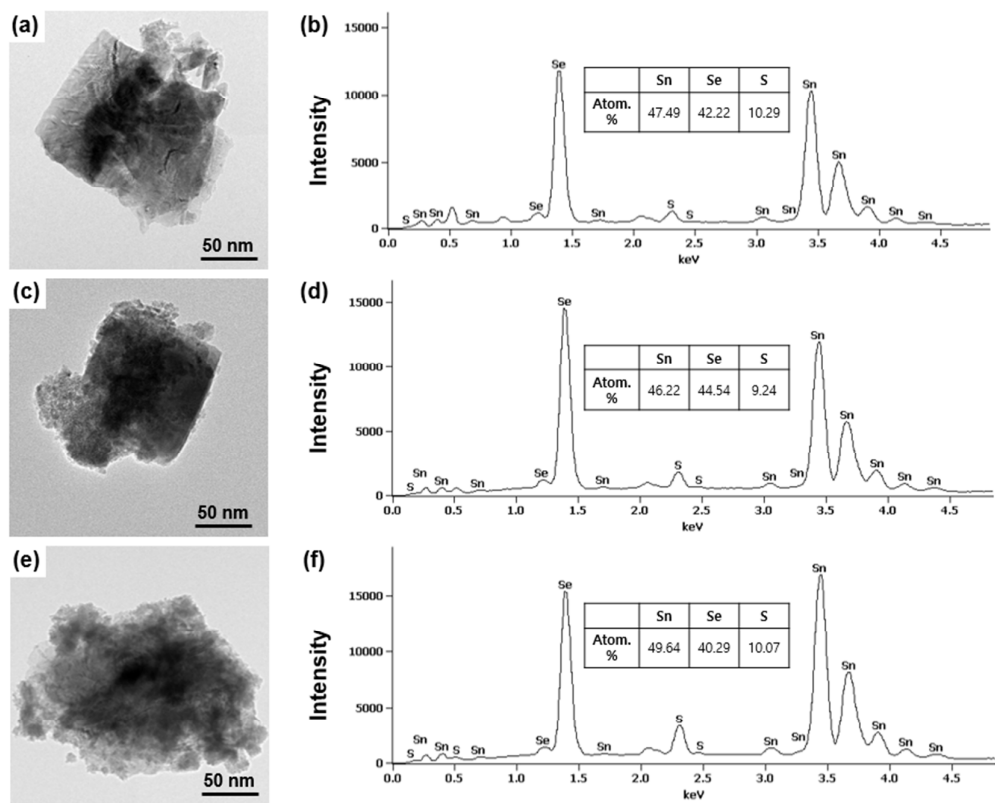

Figure S6. FE-TEM images and the corresponding EDS results for porous  $\text{SnSe}_{0.8}\text{S}_{0.2}$  NSs at the reaction temperature of (a–b) 353, (c–d) 423, and (e–f) 503 K.

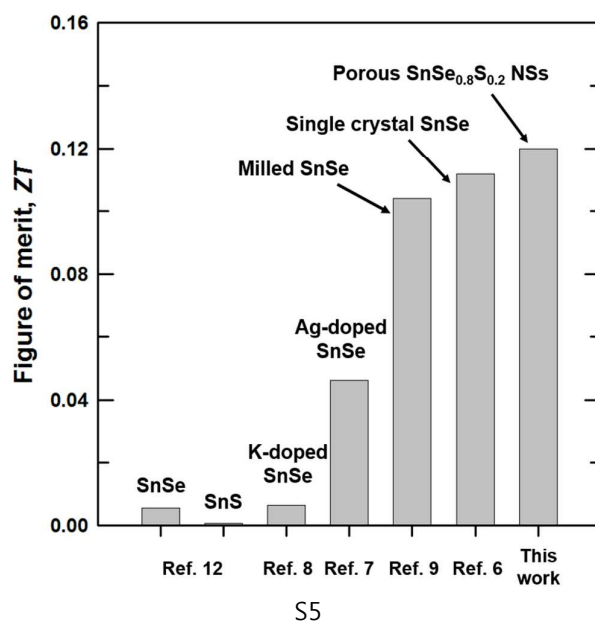

Figure S7.  $ZT$  value of the porous  $\text{SnSe}_{0.8}\text{S}_{0.2}$  NSs in this work compared with previously reported results regarding SnSe-based materials at 300 K.

## 2. Tables

| Material                 | Thermal conductivity<br>(W/m·K) | Note                        |
|--------------------------|---------------------------------|-----------------------------|
| $\text{Bi}_2\text{Te}_3$ | 1.09                            | Previously<br>reported work |
| Nanostructured BiSbTe    | 1.12                            |                             |
| Nanostructured PbTe      | 1.45                            |                             |
| Nanostructured PbSe      | 1.3                             |                             |
| PbS                      | 2.7                             |                             |

|                                                 |      |           |
|-------------------------------------------------|------|-----------|
| Nanoscale holey Si                              | 2.03 |           |
| Nanostructured SiGe                             | 2.5  |           |
| CoSb <sub>3</sub>                               | 10   |           |
| AgSn <sub>4</sub> SbTe <sub>6</sub> (LAST)      | 1.8  |           |
| Bulk SnSe                                       | 1    |           |
| SnSe <sub>0.8</sub> S <sub>0.2</sub> NSs        | 0.55 | This work |
| Porous SnSe <sub>0.8</sub> S <sub>0.2</sub> NSs | 0.4  |           |

Table S1. Thermal conductivity values of the SnSe<sub>0.8</sub>S<sub>0.2</sub> NSs and porous SnSe<sub>0.8</sub>S<sub>0.2</sub> NSs compared with previously reported thermal conductivities for various thermoelectric materials at 300 K.

|    | Before reaction | 353 K | 423 K | 503 K |
|----|-----------------|-------|-------|-------|
| Sn | 50              | 47.49 | 46.22 | 49.64 |
| Se | 40              | 42.22 | 44.54 | 40.29 |
| S  | 10              | 10.29 | 9.24  | 10.07 |

Table S2. Atomic ratios corresponding to the EDS spectra with different reaction temperatures.

### 3. Extended discussion

Extended Discussion S1. Detailed description for the parallel-connected model for the SnSe<sub>1-x</sub>S<sub>x</sub> crystals.

The parallel-connected model in the SnSe<sub>1-x</sub>S<sub>x</sub> can be written as:

$$\sigma_{SnSeS} = (1 - x_S)\sigma_{Se} + x_S\sigma_S \quad (1)$$

where  $\sigma_{SnSeS}$ ,  $x_S$ ,  $\sigma_S$ , and  $\sigma_{Se}$  are the parallel-connected electrical conductivity of the  $SnSe_{1-x}S_x$ , volume fraction of the SnS, electrical conductivity of the SnS, and electrical conductivity of the SnSe, respectively. The Seebeck coefficient with different SnS concentrations can be fitted with a parallel-connected two-component model, which is described as:

$$S_{SnSeS} = \frac{(1-x_S)\sigma_{Se}S_{Se} + x_S\sigma_S S_S}{(1-x_S)\sigma_{Se} + x_S\sigma_S} \quad (2)$$

where  $S_{SnSeS}$ ,  $S_{Se}$ , and  $S_S$  are the parallel-connected Seebeck coefficient of the  $SnSe_{1-x}S_x$ , and the Seebeck coefficients of the SnSe and SnS, respectively.
